# Supplementary material
Source: PubMed Central journal article supplement (PMC6663919)

Approximated posterior of SNP-based heritability  $h^2$

Fitted on all loci

Fitted on significant loci

Fitted on significant loci and pairs

Penicilin

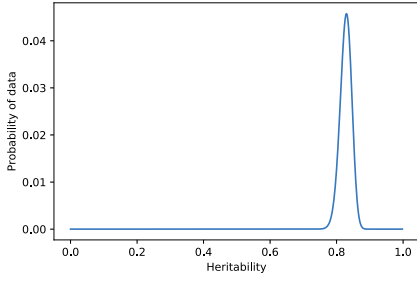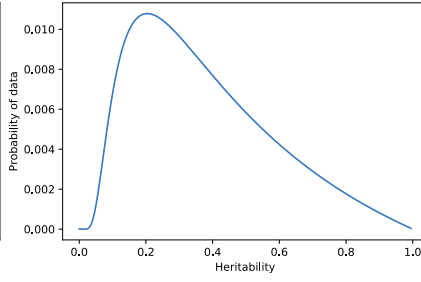

Tetracycline

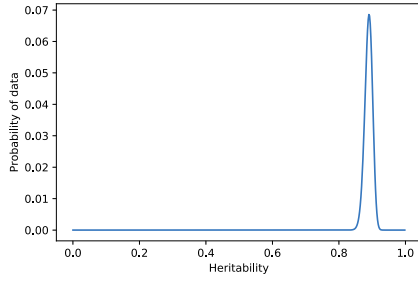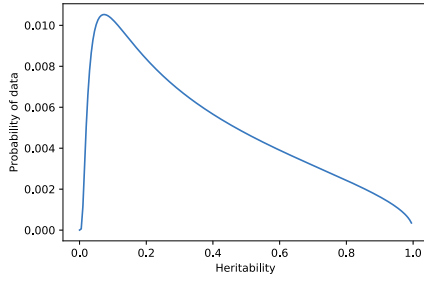

Cefixime

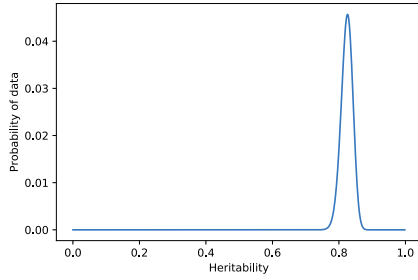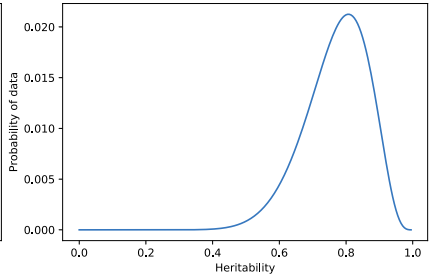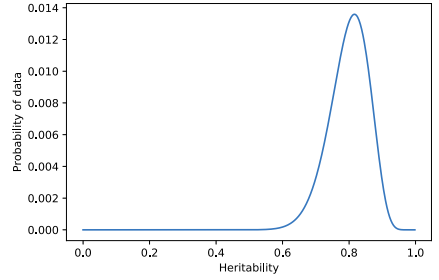

Ciprofloxacin

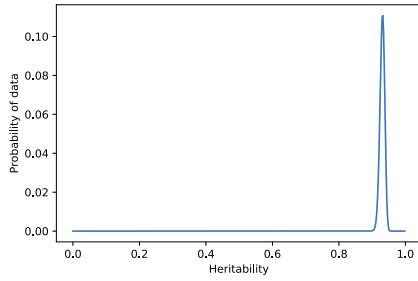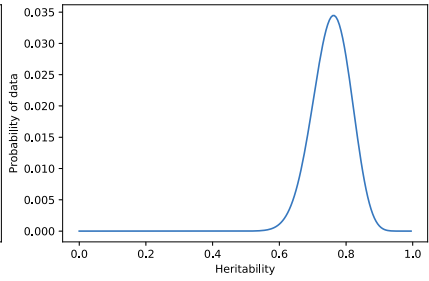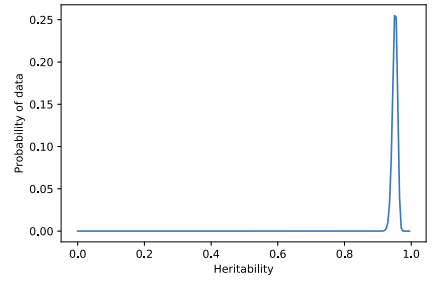

Azithromycin

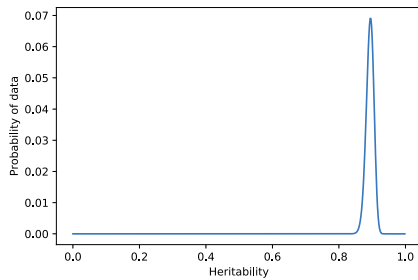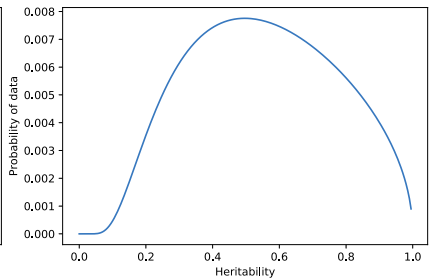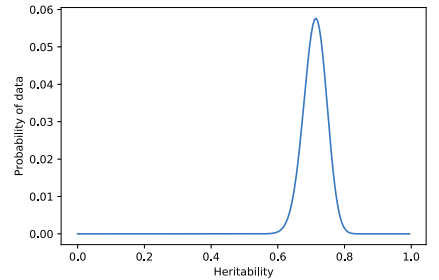

Supplement: NIHMS1022822-supplement-Supplementary_Figure_5.pdf [file NIHMS1022822-supplement-Supplementary_Figure_5.pdf]
