# Supplementary material
Source: PubMed Central journal article supplement (PMC6663919)

# MIC Distribution in test and validation dataset

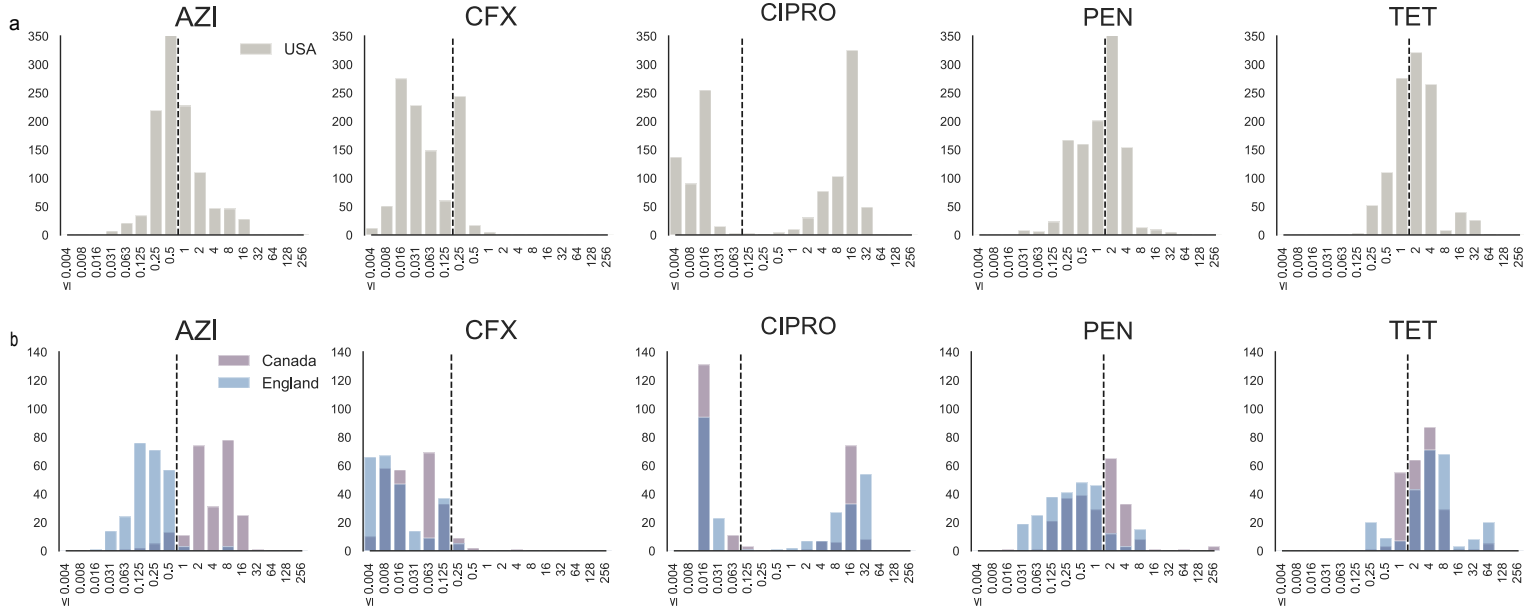

Supplement: NIHMS1022822-supplement-Supplementary_Figure_1.pdf [file NIHMS1022822-supplement-Supplementary_Figure_1.pdf]

# EC distribution before and after mixture model filtering

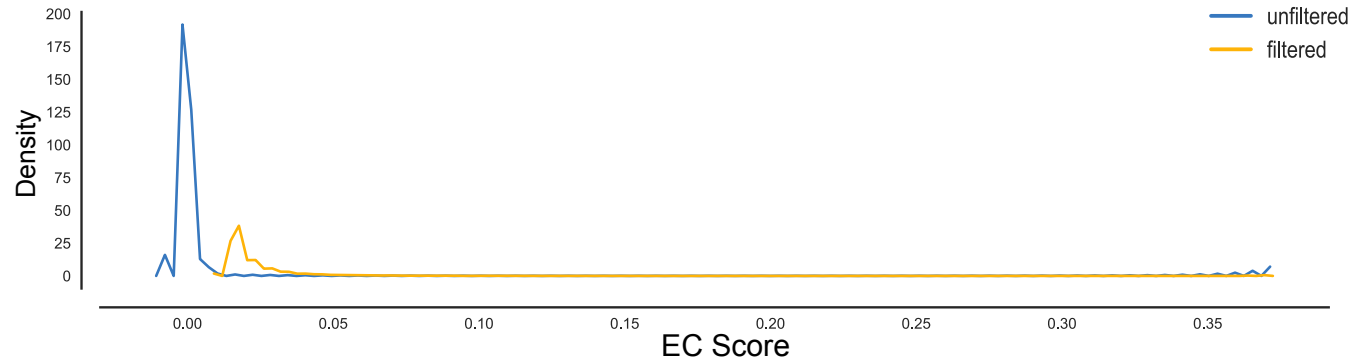

Supplement: NIHMS1022822-supplement-Supplementary_Figure_2.pdf [file NIHMS1022822-supplement-Supplementary_Figure_2.pdf]

Comparison of EC Score to simpler correlation scores

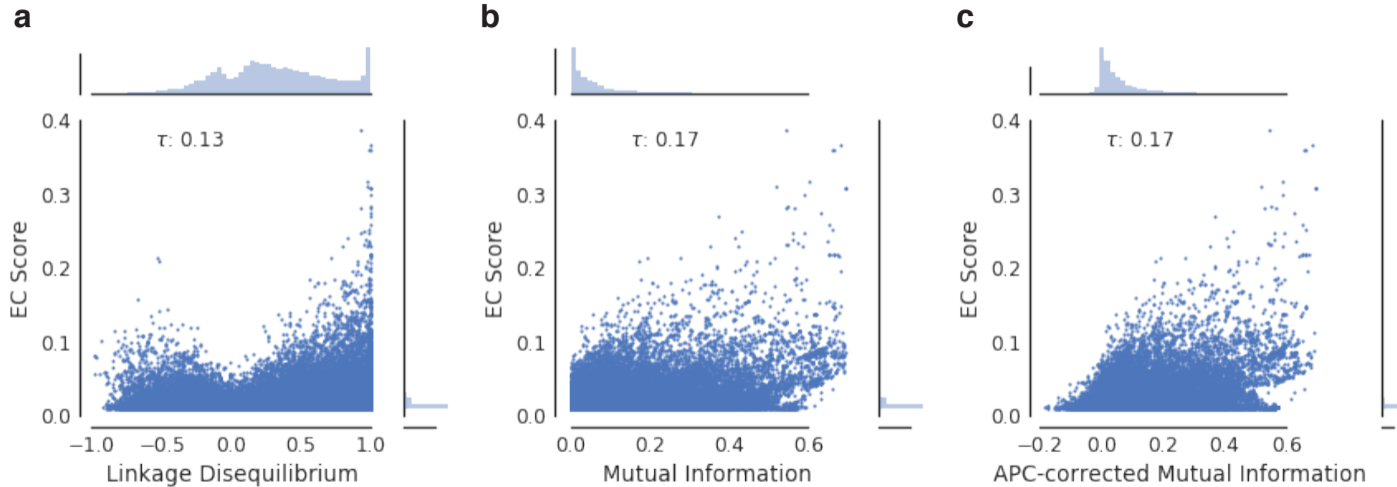

Supplement: NIHMS1022822-supplement-Supplementary_Figure_3.pdf [file NIHMS1022822-supplement-Supplementary_Figure_3.pdf]

Significant loci show greater homoplasy

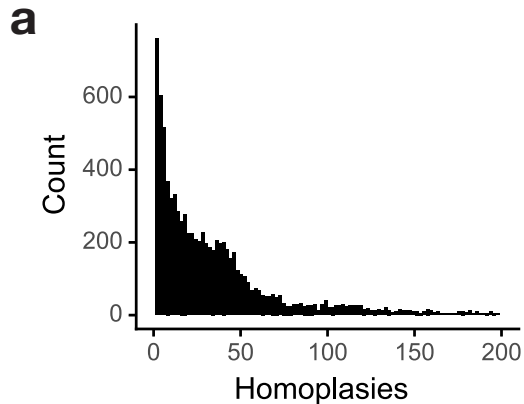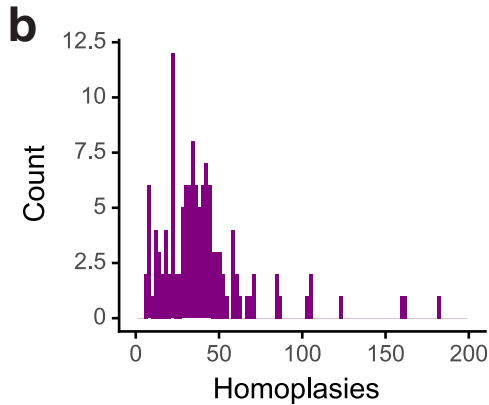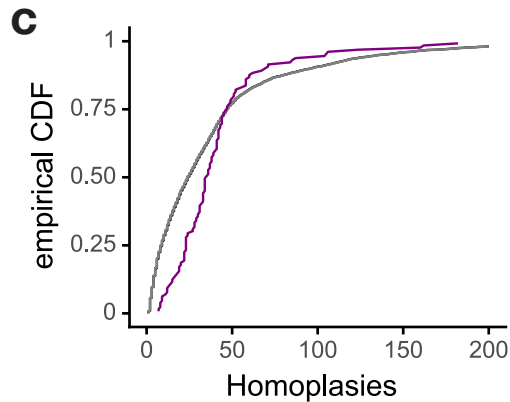

Supplement: NIHMS1022822-supplement-Supplementary_Figure_4.pdf [file NIHMS1022822-supplement-Supplementary_Figure_4.pdf]
